# Supplementary material for: Understanding crystallization processes of NiO/Ce0.9Gd0.1O2−δ sol–gel processed thin films for the design of efficient electrodes: an in situ thermal ellipsometry analysis
Source: Royal Society of Chemistry journal article supplement (doi:10.1039/c2jm16550c), 2012-01-01
Supplement: c2jm16550c.pdf [file c2jm16550c.pdf]

## Electronic Supplementary Information

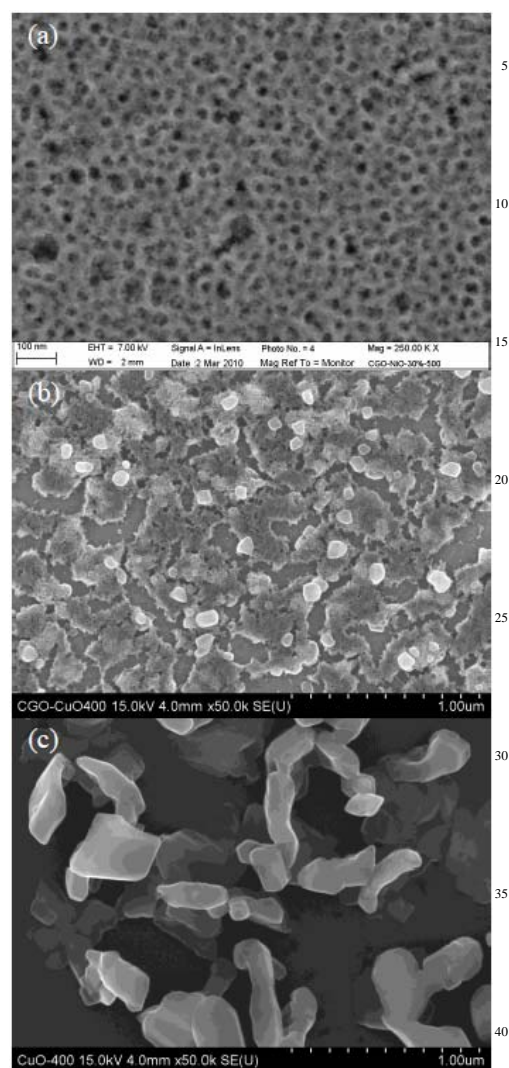

Fig.S1: FE-SEM images of NiO(50)/GDC(50) (a), CuO(50)/GDC(50) (b) mesoporous thin films calcined at 500°C and 400°C and pure-CuO (c) thin films calcined at 400°C, 10°C.min<sup>-1</sup> at air atmosphere.

60

65

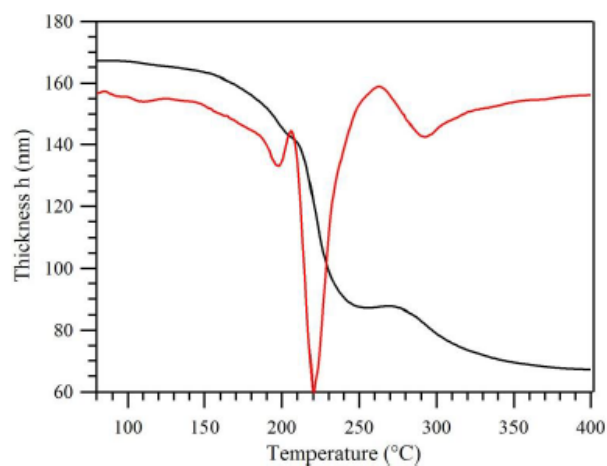

Fig.S2: Variation of the thickness  $h$  (black) as a function of the temperature (10°C.min<sup>-1</sup>) for synthesized NiO(20)/GDC(80) mesoporous thin films stabilized at 80°C and derived of the thickness curve for NiO(20)/GDC(80) (red).

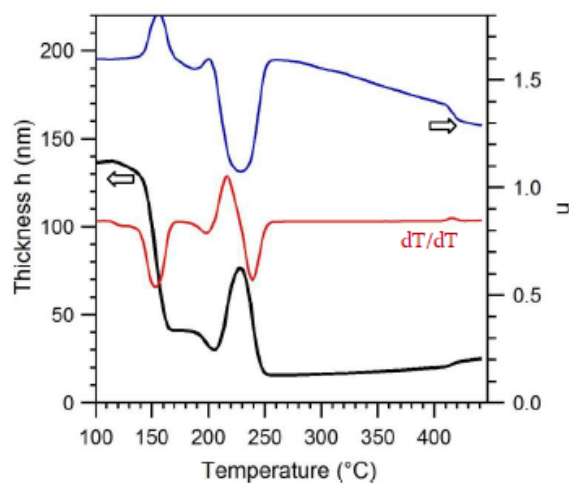

Fig.S3: Variation of the thickness  $h$  (black) and refractive index  $n$  (blue) as a function of the temperature (10°C.min<sup>-1</sup>) for synthesized CuO mesoporous thin films stabilized at 80°C and derived of the thickness curve (red). At 230-250°C, CuO thin film become discontinue as single CuO particles (figA).

50

55

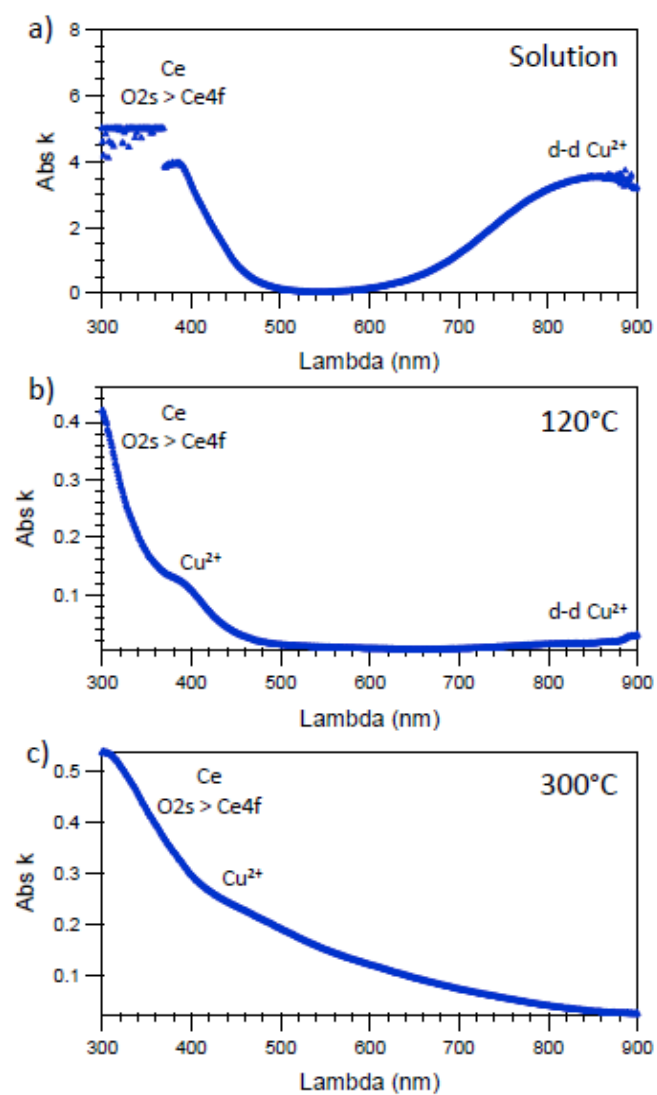

Fig.S4: UV-visible spectra of the precursors solution (a) and CuO-GDC mesoporous thin films calcined at 120°C (b) and 300°C (c) during 5 min at air atmosphere on glass substrate.

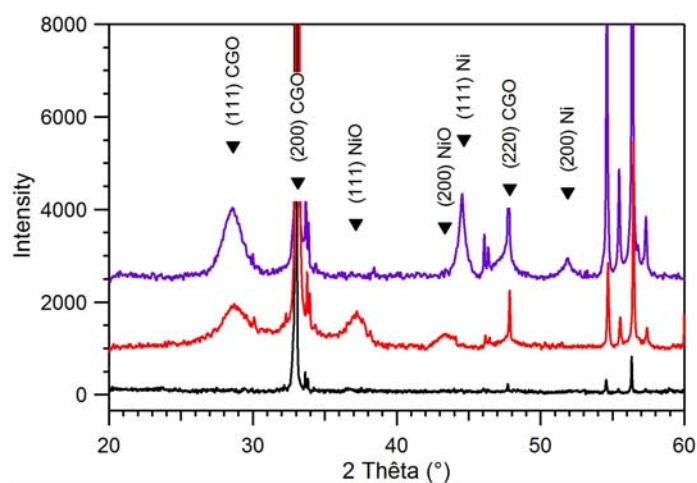

Fig.S5: Ex-situ XRD analyses of NiO to Ni reduction at 550°C under 10%H<sub>2</sub>/N<sub>2</sub>; in red the NiO/GDC mesoporous films and in purple 25 mesostructured Ni/GDC films.

5

10

15

20
